# Supplementary material for: Impact of Starch Binding Domain Fusion on Activities and Starch Product Structure of 4-α-Glucanotransferase
Source: MDPI journal article supplement (doi:10.3390/molecules28031320), 2023-01-30
Supplement: s1 [file s1]

Figure S1. Sequence alignment of CBM20s with focus on GH77 DPE2s. The alignment of all 87 CBM20 domains from 65 selected enzymes having the CBM20 (Table 1). The most important positions involved in starch-binding sites 1 and 2 – recognized in the CBM20s from *Aspergillus niger* GH15 glucoamylase (site 1: Trp543, Lys578 and Trp590; site 2: Tyr527, Tyr556 and Trp563) [9] and *Bacillus circulans* strain 251 GH13\_2 cyclodextrin glucanotransferase (site 1: Trp616, Lys651 and Trp662; site 2: Tyr633 and Trp636) [13] – are indicated, respectively, above and below the alignment by numbers “1” and “2”. If conserved, the sites 1 and 2 are highlighted in yellow and blue, respectively; conserved and non-conserved substitutions being coloured red and gray, respectively. The labels of protein sources consist of the name of the organism, letter “A”, “B” or “E” for the archaeal, bacterial and eukaryotic origin, respectively, CAZy family affiliation (if any), enzyme abbreviated name (for details, see Table 1) and the UniProt accession number. If there are more CBM20 copies for a single protein, the copies in the order of their appearance in the sequence are also indicated by the relevant number “1”, “2” and “3” (at the end of the protein label). The three CBM20 domains studied in the present work – two from GH77 *Solanum tuberosum* DPE2 and one from GH15 *Aspergillus niger* glucoamylase – are marked by an asterisk. The sequence order in the alignment (starting from the top) reflects their order in the tree in the anticlockwise manner (starting from the first sequence in the eukaryotic DPE2 cluster of CBM20 copies 2).

|                                                           |                                       |                                        |                        |                    |                    |                    |                    |                    |                        |                    |                       |                    |                       |
|-----------------------------------------------------------|---------------------------------------|----------------------------------------|------------------------|--------------------|--------------------|--------------------|--------------------|--------------------|------------------------|--------------------|-----------------------|--------------------|-----------------------|
| Alistipes finegoldii B GH77 DPE2 I3YMP0 2                 | --NPKKAAAGNITLRVLPT--                 | 2                                      | --LRPDETLAVAGSGRELGD-- | 1                  | --RIVPMD--DS--     | 2                  | --RPPWELTL--HTAH-- | 1                  | --RFEYKFLIADRK--TLTP-- | 1                  | --ILWEEGANRTWGLPGAG-- | 111                | --EHALDAAAYPRFPFRWQ-- |
| Barnesiella intestinihominis B GH77 DPE2 KOXAQ2 2         | --VETIEPTGTLTKVDA--SQ--               | --LRPDERLVMVGDGCPBLGD--                | --LWKLAPLNL--DS--      | --RPPWELTL--HTAH-- | --RPPWELTL--HTAH-- | --RPPWELTL--HTAH-- | --RPPWELTL--HTAH-- | --RPPWELTL--HTAH-- | --RPPWELTL--HTAH--     | --RPPWELTL--HTAH-- | --RPPWELTL--HTAH--    | --RPPWELTL--HTAH-- |                       |
| Tannerella sp CT1 B GH77 DPE2 G9S294 2                    | --VLPSPSTAVTQIYA--PS--                | --LRPDEVALITGTM--SEAMS--IKDAIIMD--DT-- | --RPPWELTL--HTAH--     | --RPPWELTL--HTAH-- | --RPPWELTL--HTAH-- | --RPPWELTL--HTAH-- | --RPPWELTL--HTAH-- | --RPPWELTL--HTAH-- | --RPPWELTL--HTAH--     | --RPPWELTL--HTAH-- | --RPPWELTL--HTAH--    | --RPPWELTL--HTAH-- |                       |
| Prevotella disticola B GH77 DPE2 F2KMW4 2                 | --RLNNYKAVATILKVR--PA--               | --LGADELYLTGASPAKLN--NNKALKLV--QH--    | --RPPWELTL--HTAH--     | --RPPWELTL--HTAH-- | --RPPWELTL--HTAH-- | --RPPWELTL--HTAH-- | --RPPWELTL--HTAH-- | --RPPWELTL--HTAH-- | --RPPWELTL--HTAH--     | --RPPWELTL--HTAH-- | --RPPWELTL--HTAH--    | --RPPWELTL--HTAH-- |                       |
| Dysgonomonas mossii B GH77 DPE2 F8WZP9 1                  | --KLKYKTKTLKLV--PY--                  | --IKKNQTMILSGSSGLG--NNIEKALHT--PA--    | --RPPWELTL--HTAH--     | --RPPWELTL--HTAH-- | --RPPWELTL--HTAH-- | --RPPWELTL--HTAH-- | --RPPWELTL--HTAH-- | --RPPWELTL--HTAH-- | --RPPWELTL--HTAH--     | --RPPWELTL--HTAH-- | --RPPWELTL--HTAH--    | --RPPWELTL--HTAH-- |                       |
| Tannerella forsythia B GH77 DPE2 G8URK6 2                 | --THEQDPRSLTIRV--PN--                 | --VRKNQVVALAQNQACLD--MOTQAKLL--PS--    | --RPPWELTL--HTAH--     | --RPPWELTL--HTAH-- | --RPPWELTL--HTAH-- | --RPPWELTL--HTAH-- | --RPPWELTL--HTAH-- | --RPPWELTL--HTAH-- | --RPPWELTL--HTAH--     | --RPPWELTL--HTAH-- | --RPPWELTL--HTAH--    | --RPPWELTL--HTAH-- |                       |
| Parabacteroides distasonis B GH77 DPE2 A6L7Y4 2           | --RVVRSGRKLVIKAY--PR--                | --VEKNQCVAITGQEC--LGNMHPDKALLS--CD--   | --RPPWELTL--HTAH--     | --RPPWELTL--HTAH-- | --RPPWELTL--HTAH-- | --RPPWELTL--HTAH-- | --RPPWELTL--HTAH-- | --RPPWELTL--HTAH-- | --RPPWELTL--HTAH--     | --RPPWELTL--HTAH-- | --RPPWELTL--HTAH--    | --RPPWELTL--HTAH-- |                       |
| Bacteroides thetaiotaomicron B GH77 DPE2 Q8ASU2 2         | --IPPCRHGVLVIKISA--FR--               | --INKDYCLAICGNGKALG--MDDPAKIPMS--DA--  | --RPPWELTL--HTAH--     | --RPPWELTL--HTAH-- | --RPPWELTL--HTAH-- | --RPPWELTL--HTAH-- | --RPPWELTL--HTAH-- | --RPPWELTL--HTAH-- | --RPPWELTL--HTAH--     | --RPPWELTL--HTAH-- | --RPPWELTL--HTAH--    | --RPPWELTL--HTAH-- |                       |
| Micromonas sp RC2299 E GH77 DPE2 C1FJ00 2                 | --THSRDFIT--IRLEVFT--LR--             | --LLPGQRLTATGDCAALG--MERDAPVMMDLA--    | --RPPWELTL--HTAH--     | --RPPWELTL--HTAH-- | --RPPWELTL--HTAH-- | --RPPWELTL--HTAH-- | --RPPWELTL--HTAH-- | --RPPWELTL--HTAH-- | --RPPWELTL--HTAH--     | --RPPWELTL--HTAH-- | --RPPWELTL--HTAH--    | --RPPWELTL--HTAH-- |                       |
| Trichomonas vaginalis E GH77 DPE2 A2D718 2                | --KOTGDAIQ--IYFATNC--PY--             | --VRPNQVLRVNGVPELGN--DMPKNSVLIA--DG--  | --RPPWELTL--HTAH--     | --RPPWELTL--HTAH-- | --RPPWELTL--HTAH-- | --RPPWELTL--HTAH-- | --RPPWELTL--HTAH-- | --RPPWELTL--HTAH-- | --RPPWELTL--HTAH--     | --RPPWELTL--HTAH-- | --RPPWELTL--HTAH--    | --RPPWELTL--HTAH-- |                       |
| Polyphondylium pallidum E GH77 DPE2 D3B4Z9 2              | --PSSPRKRV--IHFQVRC--TN--             | --VQVRCNVVILVGNM--LGNMTRAKILS--DQ--    | --RPPWELTL--HTAH--     | --RPPWELTL--HTAH-- | --RPPWELTL--HTAH-- | --RPPWELTL--HTAH-- | --RPPWELTL--HTAH-- | --RPPWELTL--HTAH-- | --RPPWELTL--HTAH--     | --RPPWELTL--HTAH-- | --RPPWELTL--HTAH--    | --RPPWELTL--HTAH-- |                       |
| Dictyostelium discoideum E GH77 DPE2 Q54PW3 2             | --QIADKVI--IHFQVRC--TN--              | --VQVRCNVVILVGNM--LGNMTRAKILS--DQ--    | --RPPWELTL--HTAH--     | --RPPWELTL--HTAH-- | --RPPWELTL--HTAH-- | --RPPWELTL--HTAH-- | --RPPWELTL--HTAH-- | --RPPWELTL--HTAH-- | --RPPWELTL--HTAH--     | --RPPWELTL--HTAH-- | --RPPWELTL--HTAH--    | --RPPWELTL--HTAH-- |                       |
| Chlamydomonas reinhardtii E GH77 DPE2 A8JE10 2            | --SPAPGETV--VRLQVAD--PQ--             | --LEDGEAVLVTGGIPLQ--LGNMDDQVLT--ET--   | --RPPWELTL--HTAH--     | --RPPWELTL--HTAH-- | --RPPWELTL--HTAH-- | --RPPWELTL--HTAH-- | --RPPWELTL--HTAH-- | --RPPWELTL--HTAH-- | --RPPWELTL--HTAH--     | --RPPWELTL--HTAH-- | --RPPWELTL--HTAH--    | --RPPWELTL--HTAH-- |                       |
| Volvox carterii E GH77 DPE2 D8UDU0 2                      | --APAPGETV--LRLQVAD--PQ--             | --LDAAEVLLVVTGGIPLQ--LGNMDDQVLT--ET--  | --RPPWELTL--HTAH--     | --RPPWELTL--HTAH-- | --RPPWELTL--HTAH-- | --RPPWELTL--HTAH-- | --RPPWELTL--HTAH-- | --RPPWELTL--HTAH-- | --RPPWELTL--HTAH--     | --RPPWELTL--HTAH-- | --RPPWELTL--HTAH--    | --RPPWELTL--HTAH-- |                       |
| Solanum tuberosum E GH77 DPE2 Q6R608 2                    | --LDQDGSVI--LRLQVAD--PQ--             | --LDAAEVLLVVTGGIPLQ--LGNMDDQVLT--ET--  | --RPPWELTL--HTAH--     | --RPPWELTL--HTAH-- | --RPPWELTL--HTAH-- | --RPPWELTL--HTAH-- | --RPPWELTL--HTAH-- | --RPPWELTL--HTAH-- | --RPPWELTL--HTAH--     | --RPPWELTL--HTAH-- | --RPPWELTL--HTAH--    | --RPPWELTL--HTAH-- |                       |
| Populus trichocarpa E GH77 DPE2 B9IHJ8 2                  | --KEGLDAVV--VHFQVRC--TN--             | --VEEETSIVVILGTP--LGNMDDQVLT--ET--     | --RPPWELTL--HTAH--     | --RPPWELTL--HTAH-- | --RPPWELTL--HTAH-- | --RPPWELTL--HTAH-- | --RPPWELTL--HTAH-- | --RPPWELTL--HTAH-- | --RPPWELTL--HTAH--     | --RPPWELTL--HTAH-- | --RPPWELTL--HTAH--    | --RPPWELTL--HTAH-- |                       |
| Arabidopsis thaliana E GH77 DPE2 Q8XRDU9 2                | --SDQDGSVV--VHFQVRC--TN--             | --VEEETSIVVILGTP--LGNMDDQVLT--ET--     | --RPPWELTL--HTAH--     | --RPPWELTL--HTAH-- | --RPPWELTL--HTAH-- | --RPPWELTL--HTAH-- | --RPPWELTL--HTAH-- | --RPPWELTL--HTAH-- | --RPPWELTL--HTAH--     | --RPPWELTL--HTAH-- | --RPPWELTL--HTAH--    | --RPPWELTL--HTAH-- |                       |
| Annona cherimola E GH77 DPE2 C0L7E0 2                     | --LVQEDCMV--VHFQVRC--TN--             | --VEEETSIVVILGTP--LGNMDDQVLT--ET--     | --RPPWELTL--HTAH--     | --RPPWELTL--HTAH-- | --RPPWELTL--HTAH-- | --RPPWELTL--HTAH-- | --RPPWELTL--HTAH-- | --RPPWELTL--HTAH-- | --RPPWELTL--HTAH--     | --RPPWELTL--HTAH-- | --RPPWELTL--HTAH--    | --RPPWELTL--HTAH-- |                       |
| Hordeum vulgare E GH77 DPE2 F2DIF3 2                      | --SLDPEDTV--VHFQVRC--TN--             | --VEEETSIVVILGTP--LGNMDDQVLT--ET--     | --RPPWELTL--HTAH--     | --RPPWELTL--HTAH-- | --RPPWELTL--HTAH-- | --RPPWELTL--HTAH-- | --RPPWELTL--HTAH-- | --RPPWELTL--HTAH-- | --RPPWELTL--HTAH--     | --RPPWELTL--HTAH-- | --RPPWELTL--HTAH--    | --RPPWELTL--HTAH-- |                       |
| Oryza sativa E GH77 DPE2 Q6Q002 2                         | --SLEPEDIIV--VHFQVRC--TN--            | --VEEETSIVVILGTP--LGNMDDQVLT--ET--     | --RPPWELTL--HTAH--     | --RPPWELTL--HTAH-- | --RPPWELTL--HTAH-- | --RPPWELTL--HTAH-- | --RPPWELTL--HTAH-- | --RPPWELTL--HTAH-- | --RPPWELTL--HTAH--     | --RPPWELTL--HTAH-- | --RPPWELTL--HTAH--    | --RPPWELTL--HTAH-- |                       |
| Sorghum bicolor E GH77 DPE2 C5X4T9 2                      | --SLEPEDIIV--VHFQVRC--TN--            | --VEEETSIVVILGTP--LGNMDDQVLT--ET--     | --RPPWELTL--HTAH--     | --RPPWELTL--HTAH-- | --RPPWELTL--HTAH-- | --RPPWELTL--HTAH-- | --RPPWELTL--HTAH-- | --RPPWELTL--HTAH-- | --RPPWELTL--HTAH--     | --RPPWELTL--HTAH-- | --RPPWELTL--HTAH--    | --RPPWELTL--HTAH-- |                       |
| Physcomitrella patens E GH77 DPE2 A9TKS8 2                | --PLNPSAVV--VHFQVRC--TN--             | --VEEETSIVVILGTP--LGNMDDQVLT--ET--     | --RPPWELTL--HTAH--     | --RPPWELTL--HTAH-- | --RPPWELTL--HTAH-- | --RPPWELTL--HTAH-- | --RPPWELTL--HTAH-- | --RPPWELTL--HTAH-- | --RPPWELTL--HTAH--     | --RPPWELTL--HTAH-- | --RPPWELTL--HTAH--    | --RPPWELTL--HTAH-- |                       |
| Flavobacteriaceae bacterium B GH77 DPE2 C6X010 2          | --VSVLKKKTHLFLREA--PI--               | --YQKNWQIVLMDGDLG--NNKNAIFLN--QO--     | --RPPWELTL--HTAH--     | --RPPWELTL--HTAH-- | --RPPWELTL--HTAH-- | --RPPWELTL--HTAH-- | --RPPWELTL--HTAH-- | --RPPWELTL--HTAH-- | --RPPWELTL--HTAH--     | --RPPWELTL--HTAH-- | --RPPWELTL--HTAH--    | --RPPWELTL--HTAH-- |                       |
| Elizabethkingia anophelis B GH77 DPE2 H0KPQ2 2            | --KIKPEPKSHLFTVQA--PL--               | --YQKNWQIVLMDGDLG--NNKNAIFLN--QO--     | --RPPWELTL--HTAH--     | --RPPWELTL--HTAH-- | --RPPWELTL--HTAH-- | --RPPWELTL--HTAH-- | --RPPWELTL--HTAH-- | --RPPWELTL--HTAH-- | --RPPWELTL--HTAH--     | --RPPWELTL--HTAH-- | --RPPWELTL--HTAH--    | --RPPWELTL--HTAH-- |                       |
| Ornithobacterium rhinotracheale B GH77 DPE2 I4A298 2      | --TRALKKNTHTFEITP--PL--               | --YQKNWQIVLMDGDLG--NNKNAIFLN--QO--     | --RPPWELTL--HTAH--     | --RPPWELTL--HTAH-- | --RPPWELTL--HTAH-- | --RPPWELTL--HTAH-- | --RPPWELTL--HTAH-- | --RPPWELTL--HTAH-- | --RPPWELTL--HTAH--     | --RPPWELTL--HTAH-- | --RPPWELTL--HTAH--    | --RPPWELTL--HTAH-- |                       |
| Niastella korensis B GH77 DPE2 G8TPP9 2                   | --AKAVKNATHYFKVKA--PL--               | --LEKNVVCILLGSKNALAD--QEPVFLHL--RE--   | --RPPWELTL--HTAH--     | --RPPWELTL--HTAH-- | --RPPWELTL--HTAH-- | --RPPWELTL--HTAH-- | --RPPWELTL--HTAH-- | --RPPWELTL--HTAH-- | --RPPWELTL--HTAH--     | --RPPWELTL--HTAH-- | --RPPWELTL--HTAH--    | --RPPWELTL--HTAH-- |                       |
| Paludibacter propioniciensis B GH77 DPE2 E4T2V1 2         | --LKQADTTHYLFKPLV--PV--               | --LEKNVVCILLGSKNALAD--QEPVFLHL--RE--   | --RPPWELTL--HTAH--     | --RPPWELTL--HTAH-- | --RPPWELTL--HTAH-- | --RPPWELTL--HTAH-- | --RPPWELTL--HTAH-- | --RPPWELTL--HTAH-- | --RPPWELTL--HTAH--     | --RPPWELTL--HTAH-- | --RPPWELTL--HTAH--    | --RPPWELTL--HTAH-- |                       |
| Brachiostoma floridae E GDDP5 C3Y330                      | --MTSQVTFRKYV--A--                    | --VTRHGVTGVLG--SGPLG--MHPKAVELQ--RE--  | --RPPWELTL--HTAH--     | --RPPWELTL--HTAH-- | --RPPWELTL--HTAH-- | --RPPWELTL--HTAH-- | --RPPWELTL--HTAH-- | --RPPWELTL--HTAH-- | --RPPWELTL--HTAH--     | --RPPWELTL--HTAH-- | --RPPWELTL--HTAH--    | --RPPWELTL--HTAH-- |                       |
| Homo sapiens E GDDP5 Q9NPB8                               | --MTPSQVAFERIG--T--                   | --LLPGEVFAICGSCDALG--NNKNAIFLN--QO--   | --RPPWELTL--HTAH--     | --RPPWELTL--HTAH-- | --RPPWELTL--HTAH-- | --RPPWELTL--HTAH-- | --RPPWELTL--HTAH-- | --RPPWELTL--HTAH-- | --RPPWELTL--HTAH--     | --RPPWELTL--HTAH-- | --RPPWELTL--HTAH--    | --RPPWELTL--HTAH-- |                       |
| Chondrus crispus E LAF R7QE14 2                           | --SEBQEAFFVPRFRIK--Y--                | --PDEGELVYLLGNTPELGA--MCKVHSP--LM--    | --RPPWELTL--HTAH--     | --RPPWELTL--HTAH-- | --RPPWELTL--HTAH-- | --RPPWELTL--HTAH-- | --RPPWELTL--HTAH-- | --RPPWELTL--HTAH-- | --RPPWELTL--HTAH--     | --RPPWELTL--HTAH-- | --RPPWELTL--HTAH--    | --RPPWELTL--HTAH-- |                       |
| Succinatimonas hippel B GH77 DPE2 E8L1B5 2                | --VSPANTLKSLNLR--AW--CH--             | --LDNNSALFTTGDCKALG--MCKVHSP--LM--     | --RPPWELTL--HTAH--     | --RPPWELTL--HTAH-- | --RPPWELTL--HTAH-- | --RPPWELTL--HTAH-- | --RPPWELTL--HTAH-- | --RPPWELTL--HTAH-- | --RPPWELTL--HTAH--     | --RPPWELTL--HTAH-- | --RPPWELTL--HTAH--    | --RPPWELTL--HTAH-- |                       |
| Cyanidioscyzoon merolae E LAF M1UXK5 2                    | --RSVTPTTP--VHFQVRC--TN--             | --VEEETSIVVILGTP--LGNMDDQVLT--ET--     | --RPPWELTL--HTAH--     | --RPPWELTL--HTAH-- | --RPPWELTL--HTAH-- | --RPPWELTL--HTAH-- | --RPPWELTL--HTAH-- | --RPPWELTL--HTAH-- | --RPPWELTL--HTAH--     | --RPPWELTL--HTAH-- | --RPPWELTL--HTAH--    | --RPPWELTL--HTAH-- |                       |
| Chondrus crispus E LAF R7QE14 2                           | --RSVTPTTP--VHFQVRC--TN--             | --VEEETSIVVILGTP--LGNMDDQVLT--ET--     | --RPPWELTL--HTAH--     | --RPPWELTL--HTAH-- | --RPPWELTL--HTAH-- | --RPPWELTL--HTAH-- | --RPPWELTL--HTAH-- | --RPPWELTL--HTAH-- | --RPPWELTL--HTAH--     | --RPPWELTL--HTAH-- | --RPPWELTL--HTAH--    | --RPPWELTL--HTAH-- |                       |
| Arabidopsis thaliana E GMD3 Q6ZY51                        | --KKGDSGTGKVLNRLDHO--V--              | --SDVQFIAVTDGKLCGRNTYIPL--             | --RPPWELTL--HTAH--     | --RPPWELTL--HTAH-- | --RPPWELTL--HTAH-- | --RPPWELTL--HTAH-- | --RPPWELTL--HTAH-- | --RPPWELTL--HTAH-- | --RPPWELTL--HTAH--     | --RPPWELTL--HTAH-- | --RPPWELTL--HTAH--    | --RPPWELTL--HTAH-- |                       |
| Oryza sativa E GMD3 Q2QTC2                                | --RDSGSQPLVHLQVLEHQ--V--              | --SDVQFIAVTDGKLCGRNTYIPL--             | --RPPWELTL--HTAH--     | --RPPWELTL--HTAH-- | --RPPWELTL--HTAH-- | --RPPWELTL--HTAH-- | --RPPWELTL--HTAH-- | --RPPWELTL--HTAH-- | --RPPWELTL--HTAH--     | --RPPWELTL--HTAH-- | --RPPWELTL--HTAH--    | --RPPWELTL--HTAH-- |                       |
| Homo sapiens E GND1 Q95210                                | --AGSQQVSVFQVHY--VT--                 | --SDVQFIAVTDGKLCGRNTYIPL--             | --RPPWELTL--HTAH--     | --RPPWELTL--HTAH-- | --RPPWELTL--HTAH-- | --RPPWELTL--HTAH-- | --RPPWELTL--HTAH-- | --RPPWELTL--HTAH-- | --RPPWELTL--HTAH--     | --RPPWELTL--HTAH-- | --RPPWELTL--HTAH--    | --RPPWELTL--HTAH-- |                       |
| Homo sapiens E LAF Q95278                                 | --MTRFPRFV--P--                       | --PAGAVARELLVVGSRPELGR--MCKVHSP--LM--  | --RPPWELTL--HTAH--     | --RPPWELTL--HTAH-- | --RPPWELTL--HTAH-- | --RPPWELTL--HTAH-- | --RPPWELTL--HTAH-- | --RPPWELTL--HTAH-- | --RPPWELTL--HTAH--     | --RPPWELTL--HTAH-- | --RPPWELTL--HTAH--    | --RPPWELTL--HTAH-- |                       |
| Nematostella vectensis E LAF A7SVN9                       | --MSITVYFSVVT--F--                    | --IREPTELLVVGSRPELGR--MCKVHSP--LM--    | --RPPWELTL--HTAH--     | --RPPWELTL--HTAH-- | --RPPWELTL--HTAH-- | --RPPWELTL--HTAH-- | --RPPWELTL--HTAH-- | --RPPWELTL--HTAH-- | --RPPWELTL--HTAH--     | --RPPWELTL--HTAH-- | --RPPWELTL--HTAH--    | --RPPWELTL--HTAH-- |                       |
| Thermococcus sp B1001 A GH13 2 CGT Q9UWN2                 | --YLTNKQIPALFVFRNTQ--LGNMDDQVLT--ET-- | --VEEETSIVVILGTP--LGNMDDQVLT--ET--     | --RPPWELTL--HTAH--     | --RPPWELTL--HTAH-- | --RPPWELTL--HTAH-- | --RPPWELTL--HTAH-- | --RPPWELTL--HTAH-- | --RPPWELTL--HTAH-- | --RPPWELTL--HTAH--     | --RPPWELTL--HTAH-- | --RPPWELTL--HTAH--    | --RPPWELTL--HTAH-- |                       |
| Geobacillus stearothermophilus B GH13 2 MGA P19531        | --LLSGTQTSVVFVTKSAPP--                | --NLGDKIYLTGNTPELGA--MCKVHSP--LM--     | --RPPWELTL--HTAH--     | --RPPWELTL--HTAH-- | --RPPWELTL--HTAH-- | --RPPWELTL--HTAH-- | --RPPWELTL--HTAH-- | --RPPWELTL--HTAH-- | --RPPWELTL--HTAH--     | --RPPWELTL--HTAH-- | --RPPWELTL--HTAH--    | --RPPWELTL--HTAH-- |                       |
| Bacillus circulans B GH13 2 CGT P43379                    | --VLSDGQSVFVFN--AT--                  | --TALGQNVYLTGNTPELGA--MCKVHSP--LM--    | --RPPWELTL--HTAH--     | --RPPWELTL--HTAH-- | --RPPWELTL--HTAH-- | --RPPWELTL--HTAH-- | --RPPWELTL--HTAH-- | --RPPWELTL--HTAH-- | --RPPWELTL--HTAH--     | --RPPWELTL--HTAH-- | --RPPWELTL--HTAH--    | --RPPWELTL--HTAH-- |                       |
| Microbulbifer thermotolerans B GH13 2 M3H A0A0A0Q457      | --VLSDGQSVFVFN--AT--                  | --TALGQNVYLTGNTPELGA--MCKVHSP--LM--    | --RPPWELTL--HTAH--     | --RPPWELTL--HTAH-- | --RPPWELTL--HTAH-- | --RPPWELTL--HTAH-- | --RPPWELTL--HTAH-- | --RPPWELTL--HTAH-- | --RPPWELTL--HTAH--     | --RPPWELTL--HTAH-- | --RPPWELTL--HTAH--    | --RPPWELTL--HTAH-- |                       |
| Thermoaerobacterium thermosulfurogenes B GH14 BAMY P19584 | --LTPNGTIPVTFVFN--AT--                | --TALGQNVYLTGNTPELGA--MCKVHSP--LM--    | --RPPWELTL--HTAH--     | --RPPWELTL--HTAH-- | --RPPWELTL--HTAH-- | --RPPWELTL--HTAH-- | --RPPWELTL--HTAH-- | --RPPWELTL--HTAH-- | --RPPWELTL--HTAH--     | --RPPWELTL--HTAH-- | --RPPWELTL--HTAH--    | --RPPWELTL--HTAH-- |                       |
| Coralococcus sp EGB B GH13 6 M6H A0A076B2B6               | --PPGTGATVTFVFN--GT--                 | --TALGQNVYLTGNTPELGA--MCKVHSP--LM--    | --RPPWELTL--HTAH--     | --RPPWELTL--HTAH-- | --RPPWELTL--HTAH-- | --RPPWELTL--HTAH-- | --RPPWELTL--HTAH-- | --RPPWELTL--HTAH-- | --RPPWELTL--HTAH--     | --RPPWELTL--HTAH-- | --RPPWELTL--HTAH--    | --RPPWELTL--HTAH-- |                       |
| Pseudomonas stutzeri B GH13 M4H P13507                    | --GEPGADSVTFVFN--GT--                 | --TALGQNVYLTGNTPELGA--MCKVHSP--LM--    | --RPPWELTL--HTAH--     | --RPPWELTL--HTAH-- | --RPPWELTL--HTAH-- | --RPPWELTL--HTAH-- | --RPPWELTL--HTAH-- | --RPPWELTL--HTAH-- | --RPPWELTL--HTAH--     | --RPPWELTL--HTAH-- | --RPPWELTL--HTAH--    | --RPPWELTL--HTAH-- |                       |
| Arthrobacter globiformis B GH31 6AGT Q6B6D5               | --TLGESVMAVTFVFN--GT--                | --TALGQNVYLTGNTPELGA--MCKVHSP--LM--    | --RPPWELTL--HTAH--     | --RPPWELTL--HTAH-- | --RPPWELTL--HTAH-- | --RPPWELTL--HTAH-- | --RPPWELTL--HTAH-- | --RPPWELTL--HTAH-- | --RPPWELTL--HTAH--     | --RPPWELTL--HTAH-- | --RPPWELTL--HTAH--    | --RPPWELTL--HTAH-- |                       |
| Bacillus circulans B GH13 ICGT A0P8W9                     | --GEPGADSVTFVFN--GT--                 | --TALGQNVYLTGNTPELGA--MCKVHSP--LM--    | --RPPWELTL--HTAH--     | --RPPWELTL--HTAH-- | --RPPWELTL--HTAH-- | --RPPWELTL--HTAH-- | --RPPWELTL--HTAH-- | --RPPWELTL--HTAH-- | --RPPWELTL--HTAH--     | --RPPWELTL--HTAH-- | --RPPWELTL--HTAH--    | --RPPWELTL--HTAH-- |                       |
| Bacillus circulans B GH19 AAMY A0P8X0                     | --TGEPGADSVTFVFN--GT--                | --TALGQNVYLTGNTPELGA--MCKVHSP--LM--    | --RPPWELTL--HTAH--     | --RPPWELTL--HTAH-- | --RPPWELTL--HTAH-- | --RPPWELTL--HTAH-- | --RPPWELTL--HTAH-- | --RPPWELTL--HTAH-- | --RPPWELTL--HTAH--     | --RPPWELTL--HTAH-- | --RPPWELTL--HTAH--    | --RPPWELTL--HTAH-- |                       |
| Thermococcus kodakarensis A C01 HYP0 Q5JF12               | --TKTESREITVTFVFN--GT--               | --TALGQNVYLTGNTPELGA--MCKVHSP--LM--    | --RPPWELTL--HTAH--     | --RPPWELTL--HTAH-- | --RPPWELTL--HTAH-- | --RPPWELTL--HTAH-- | --RPPWELTL--HTAH-- | --RPPWELTL--HTAH-- | --RPPWELTL--HTAH--     | --RPPWELTL--HTAH-- | --RPPWELTL--HTAH--    | --RPPWELTL--HTAH-- |                       |
| Kosmotoga olearia B GH57 APUL C5CEB0 1                    | --PSPKGTITVTFVFN--GT--                | --TALGQNVYLTGNTPELGA--MCKVHSP--LM--    | --RPPWELTL--HTAH--     | --RPPWELTL--HTAH-- | --RPPWELTL--HTAH-- | --RPPWELTL--HTAH-- | --RPPWELTL--HTAH-- | --RPPWELTL--HTAH-- | --RPPWELTL--HTAH--     | --RPPWELTL--HTAH-- | --RPPWELTL--HTAH--    | --RPPWELTL--HTAH-- |                       |
| Kosmotoga olearia B GH57 APUL C5CEB0 3                    | --VPTGTARVIFKVKLPW--                  | --TPFDDIYITGT--FNGMKTGDPDITL--E--      | --RPPWELTL--HTAH--     | --RPPWELTL--HTAH-- | --RPPWELTL--HTAH-- | --RPPWELTL--HTAH-- | --RPPWELTL--HTAH-- | --RPPWELTL--HTAH-- | --RPPWELTL--HTAH--     | --RPPWELTL--HTAH-- | --RPPWELTL--HTAH--    | --RPPWELTL--HTAH-- |                       |
| Kosmotoga olearia B GH57 APUL C5CEB0 2                    | --AQGPGEVTFVFN--GT--                  | --TALGQNVYLTGNTPELGA--MCKVHSP--LM--    | --RPPWELTL--HTAH--     | --RPPWELTL--HTAH-- | --RPPWELTL--HTAH-- | --RPPWELTL--HTAH-- | --RPPWELTL--HTAH-- | --RPPWELTL--HTAH-- | --RPPWELTL--HTAH--     | --RPPWELTL--HTAH-- | --RPPWELTL--HTAH--    | --RPPWELTL--HTAH-- |                       |
| Geobacillus thermocovorans B GH13 39 APUL I1WWV6          | --TPD1VMKVIKFKAPD--                   | --LNGMKTGDPDITL--E--                   | --RPPWELTL--HTAH--     | --RPPWELTL--HTAH-- | --RPPWELTL--HTAH-- | --RPPWELTL--HTAH-- | --RPPWELTL--HTAH-- | --RPPWELTL--HTAH-- | --RPPWELTL--HTAH--     | --RPPWELTL--HTAH-- | --RPPWELTL--HTAH--    | --RPPWELTL--HTAH-- |                       |
| Bacillus sp XAL601 B GH13 39 APUL Q45643                  | --TPD1VMKVIKFKAPD--                   | --LNGMKTGDPDITL--E--                   | --RPPWELTL--HTAH--     | --RPPWELTL--HTAH-- | --RPPWELTL--HTAH-- | --RPPWELTL--HTAH-- | --RPPWELTL--HTAH-- | --RPPWELTL--HTAH-- | --RPPWELTL--HTAH--     | --RPPWELTL--HTAH-- | --RPPWELTL--HTAH--    | --RPPWELTL--HTAH-- |                       |
| Streptomyces griseus B GH13 32                            | --PGGTQVTSASPHINA--T--                | --TALGQNVYLTGNTPELGA--MCKVHSP--LM--    | --RPPWELTL--HTAH--     | --RPPWELTL--HTAH-- | --RPPWELTL--HTAH-- | --RPPWELTL--HTAH-- | --RPPWELTL--HTAH-- | --RPPWELTL--HTAH-- | --RPPWELTL--HTAH--     | --RPPWELTL--HTAH-- | --RPPWELTL--HTAH--    | --RPPWELTL--HTAH-- |                       |
| Pseudomonas sp K08940 B GH13 M5H Q52516                   | --AAAGAAVSLTPTNETA--D--               | --TALGQNVYLTGNTPELGA--MCKVHSP--LM--    | --RPPWELTL--HTAH--     | --RPPWELTL--HTAH-- | --RPPWELTL--HTAH-- | --RPPWELTL--HTAH-- | --RPPWELTL--HTAH-- | --RPPWELTL--HTAH-- | --RPPWELTL--HTAH--     | --RPPWELTL--HTAH-- | --RPPWELTL--HTAH--    | --RPPWELTL--HTAH-- |                       |
| Aspergillus kawachii E GH13 1 AAMY Q13296                 | --TATSTLTITPTFERLV--T--               | --TALGQNVYLTGNTPELGA--MCKVHSP--LM--    | --RPPWELTL--HTAH--     | --RPPWELTL--HTAH-- | --RPPWELTL--HTAH-- | --RPPWELTL--HTAH-- | --RPPWELTL--HTAH-- | --RPPWELTL--HTAH-- | --RPPWELTL--HTAH--     | --RPPWELTL--HTAH-- | --RPPWELTL--HTAH--    | --RPPWELTL--HTAH-- |                       |
| Aspergillus niger E GH15 GAMY P69328                      | --CTTPATVAVTPTDLTA--S--               | --TALGQNVYLTGNTPELGA--MCKVHSP--LM--    | --RPPWELTL--HTAH--     | --RPPWELTL--HTAH-- | --RPPWELTL--HTAH-- | --RPPWELTL--HTAH-- | --RPPWELTL--HTAH-- | --RPPWELTL--HTAH-- | --RPPWELTL--HTAH--     | --RPPWELTL--HTAH-- | --RPPWELTL--HTAH--    | --RPPWELTL--HTAH-- |                       |
| Neurospora crassa E AAL3 LPMO Q7SC93                      | --CTPAATVAVTPTDLTA--S--               | --TALGQNVYLTGNTPELGA--MCKVHSP--LM--    | --RPPWEL               |                    |                    |                    |                    |                    |                        |                    |                       |                    |                       |
